# Supplementary material for: Modeling Two-Dimensional Guillotine Cutting Problems via Integer Programming
Source: Atypon-hosted journal article supplement (doi:10.1287/ijoc.2016.0710), 2016-10-05
Supplement: ijoc.2016.0710-sm.pdf [file ijoc.2016.0710-sm.pdf]

Authors are encouraged to submit new papers to INFORMS journals by means of a style file template, which includes the journal title. However, use of a template does not certify that the paper has been accepted for publication in the named journal. INFORMS journal templates are for the exclusive purpose of submitting to an INFORMS journal and should not be used to distribute the papers in print or online or to submit the papers to another publication.

# Online Supplement to the paper: Modeling Two-Dimensional Guillotine Cutting Problems via Integer Programming

Fabio Furini

LAMSADE, Université Paris-Dauphine, Place du Maréchal de Lattre de Tassigny,  
75775 Paris, France [fabio.furini@dauphine.fr](mailto:fabio.furini@dauphine.fr)

Enrico Malaguti, Dimitri Thomopulos

DEI, Università di Bologna, Viale Risorgimento 2, 40136 Bologna, Italy  
[enrico.malaguti@unibo.it](mailto:enrico.malaguti@unibo.it), [dimitri.thomopulos@unibo.it](mailto:dimitri.thomopulos@unibo.it)

---

## 1. Redundant-Cut reduction

Conditions 1 and 2 of Remark 3 are checked during the enumeration of plates and variables through Procedure 1. In order to check these conditions, we associate four flags to each plate. The flags can assume values  $-1$ ,  $0$ ,  $1$  (denoting that the plate is obtained through a trim cut only, it is not obtained through a trim cut with the same orientation, and it is obtained without a trim cut, respectively):

- Flag  $sh$  indicates the status of the plate with respect to a cut with orientation  $h$ ;
- Flag  $sv$  indicates the status of the plate with respect to a cut with orientation  $v$ ;
- Flag  $fh$  indicates the status of flags  $sh$  for all the father plates of the plate;
- Flag  $fv$  indicates the status of flags  $sv$  for all the father plates of the plate.

At step 3 of Procedure 1 we select plate  $j$ , and check if it can be eventually obtained (again) by further cuts from plates in  $J$ . If this is the case, we cannot safely remove redundant cuts, otherwise, at step 6:

- if one (or more) of the flags of plate  $j$  has value -1, do not perform trim cuts on  $j$  in the flag orientation.

At step 7, if a *new* plate  $j_1 \notin J$  is obtained from  $j$  through a trim cut with orientation  $h$ :

- set the flag  $sh$  of  $j_1$  to -1;
- set the flag  $sv$  of  $j_1$  to 0;
- set the flags  $fh$  and  $fv$  equal to flags  $sh$  and  $sv$  of  $j$ ;

if a *new* plate  $j_1 \notin J$  is obtained from  $j$  through a trim cut with orientation  $v$ :

- set the flag  $sv$  of  $j_1$  to -1;
- set the flag  $sh$  of  $j_1$  to 0;
- set the flags  $fh$  and  $fv$  equal to flags  $sh$  and  $sv$  of  $j$ ;

if an *existing* plate  $j_1 \in J$  is obtained from  $j$  through a trim cut:

- if  $sh$  of  $j$  is larger than -1, set the flag  $fh$  of  $j_1$  to 1;
- if  $sv$  of  $j$  is larger than -1, set the flag  $fv$  of  $j_1$  to 1;

if a plate (new or existing)  $j_1$  is obtained from  $j$  without a trim cut:

- set all flags of  $j_1$  to 1.

## 2. Computational experiments - additional results

Table 1 reports the features for the small-size instances, i.e., those instances having less than 200,000 variables in the *Complete PP-G2KP Model*.

Table 2 reports the results obtained by applying the proposed solution procedure to the small-size instances.

| <i>name</i>   | <i>instance features</i> |          |           |        | <i>Complete PP-G2KP Model</i> |               |           |            |
|---------------|--------------------------|----------|-----------|--------|-------------------------------|---------------|-----------|------------|
|               | <i>opt</i>               | <i>n</i> | $\bar{n}$ | $\rho$ | <i>vars</i>                   | <i>plates</i> | <i>t</i>  | <i>gap</i> |
| <i>cgcut1</i> | 244                      | 7        | 16        | 10.0   | 801                           | 140           | 0.1       | 0.0        |
| <i>CHL5</i>   | 390                      | 10       | 18        | 20.0   | 2,858                         | 345           | 0.6       | 0.0        |
| <i>Hchl8s</i> | 911                      | 10       | 18        | 49.0   | 13,997                        | 896           | <i>tl</i> | 1.8        |
| <i>OF2</i>    | 2,690                    | 10       | 24        | 10.0   | 37,261                        | 2,110         | 66.0      | 0.0        |
| <i>cgcut3</i> | 1,860                    | 19       | 62        | 6.4    | 38,485                        | 1,860         | 58.6      | 0.0        |
| <i>wang20</i> | 2,721                    | 19       | 42        | 6.4    | 38,485                        | 1,860         | 60.7      | 0.0        |
| <i>3</i>      | 1,860                    | 20       | 62        | 6.4    | 38,485                        | 1,860         | 81.6      | 0.0        |
| <i>3s</i>     | 2,721                    | 20       | 62        | 6.4    | 38,485                        | 1,860         | 60.7      | 0.0        |
| <i>W</i>      | 2,721                    | 20       | 62        | 6.4    | 38,485                        | 1,860         | 56.5      | 0.0        |
| <i>OF1</i>    | 2,737                    | 10       | 23        | 10.0   | 38,608                        | 2,098         | 53.9      | 0.0        |
| <i>gcut1</i>  | 48,368                   | 10       | 10        | 3.8    | 39,896                        | 4,429         | 8.8       | 0.0        |
| <i>A1</i>     | 2,020                    | 20       | 62        | 5.6    | 45,333                        | 2,040         | 85.4      | 0.0        |
| <i>A1s</i>    | 2,950                    | 20       | 62        | 5.6    | 45,333                        | 2,040         | 82.3      | 0.0        |
| <i>cgcut2</i> | 2,892                    | 10       | 23        | 10.0   | 52,590                        | 2,017         | 58.4      | 0.0        |
| <i>2</i>      | 2,892                    | 10       | 23        | 10.0   | 52,590                        | 2,017         | 55.2      | 0.0        |
| <i>2s</i>     | 2,778                    | 10       | 23        | 10.0   | 52,590                        | 2,017         | 57.2      | 0.0        |
| <i>CHL2</i>   | 2,326                    | 10       | 19        | 6.1    | 57,567                        | 2,348         | 104.1     | 0.0        |
| <i>CHL2s</i>  | 3,279                    | 10       | 19        | 6.1    | 57,567                        | 2,348         | 110.4     | 0.0        |
| <i>A2</i>     | 2,505                    | 20       | 53        | 5.0    | 61,047                        | 2,276         | 236.6     | 0.0        |
| <i>A2s</i>    | 3,535                    | 20       | 53        | 5.0    | 61,047                        | 2,276         | 131.0     | 0.0        |
| <i>STS2</i>   | 4,620                    | 30       | 78        | 8.5    | 118,036                       | 3,383         | 289.8     | 0.0        |
| <i>STS2s</i>  | 4,653                    | 30       | 78        | 8.5    | 118,036                       | 3,383         | 385.7     | 0.0        |
| <i>Hchl9</i>  | 5,240                    | 35       | 76        | 7.6    | 130,738                       | 3,666         | 612.5     | 0.0        |
| <i>A3</i>     | 5,451                    | 20       | 46        | 5.7    | 134,164                       | 3,752         | 435.5     | 0.0        |
| <i>HH</i>     | 11,586                   | 5        | 18        | 7.5    | 141,167                       | 5,486         | <i>tl</i> | 4.5        |
| <i>A4</i>     | 6,179                    | 20       | 35        | 10.0   | 179,759                       | 4,860         | 1,259.0   | 0.0        |

**Table 1** Small-size instances.

| <i>name</i>   | <i>t<sub>tot</sub></i> | <i>t<sub>gen</sub></i> (%) | <i>t<sub>LB</sub></i> (%) | <i>linear relaxation</i>   |                          | <i>Priced PP-G2KP Model</i> |            |
|---------------|------------------------|----------------------------|---------------------------|----------------------------|--------------------------|-----------------------------|------------|
|               |                        |                            |                           | <i>t<sub>LIP</sub></i> (%) | <i>gap<sub>LIP</sub></i> | <i>t</i> (%)                | <i>gap</i> |
| <i>cgcut1</i> | 0.6                    | 0.0                        | 96.8                      | 1.6                        | 0.2                      | 1.6                         | 0.0        |
| <i>CHL5</i>   | 1.4                    | 0.7                        | 86.2                      | 5.1                        | 8.3                      | 8.0                         | 0.0        |
| <i>Hchl8s</i> | 3,638.2                | 0.0                        | 1.1                       | 0.0                        | 22.0                     | 98.9*                       | 0.8        |
| <i>OF2</i>    | 4.3                    | 0.7                        | 69.7                      | 27.7                       | 7.8                      | 1.8                         | 0.0        |
| <i>cgcut3</i> | 13.9                   | 0.3                        | 53.8                      | 7.6                        | 13.5                     | 38.3                        | 0.0        |
| <i>wang20</i> | 1.9                    | 2.7                        | 58.9                      | 37.3                       | 5.0                      | 1.1                         | 0.0        |
| <i>3</i>      | 16.3                   | 0.2                        | 63.2                      | 7.0                        | 14.5                     | 29.6                        | 0.0        |
| <i>3s</i>     | 1.9                    | 2.6                        | 58.1                      | 38.7                       | 5.0                      | 0.5                         | 0.0        |
| <i>W</i>      | 1.8                    | 2.2                        | 43.1                      | 53.6                       | 3.6                      | 1.1                         | 0.0        |
| <i>OF1</i>    | 2.1                    | 2.3                        | 34.6                      | 58.9                       | 1.5                      | 4.2                         | 0.0        |
| <i>gcut1</i>  | 0.3                    | 3.1                        | 78.1                      | 9.4                        | 4.7                      | 9.4                         | 0.0        |
| <i>A1</i>     | 9.8                    | 0.4                        | 84.8                      | 14.5                       | 15.1                     | 0.3                         | 0.0        |
| <i>A1s</i>    | 1.5                    | 3.4                        | 33.1                      | 62.8                       | 0.0                      | 0.7                         | 0.0        |
| <i>cgcut2</i> | 10.0                   | 0.5                        | 78.6                      | 20.7                       | 12.5                     | 0.2                         | 0.0        |
| <i>2</i>      | 9.2                    | 0.4                        | 84.4                      | 14.9                       | 12.5                     | 0.3                         | 0.0        |
| <i>2s</i>     | 9.6                    | 0.5                        | 79.2                      | 19.2                       | 13.0                     | 1.0                         | 0.0        |
| <i>CHL2</i>   | 65.7                   | 0.1                        | 10.0                      | 3.1                        | 6.8                      | 86.8                        | 0.0        |
| <i>CHL2s</i>  | 23.9                   | 0.2                        | 23.7                      | 6.3                        | 6.6                      | 69.8                        | 0.0        |
| <i>A2</i>     | 47.9                   | 0.1                        | 19.8                      | 3.2                        | 15.7                     | 76.9                        | 0.0        |
| <i>A2s</i>    | 2.4                    | 2.9                        | 45.0                      | 50.4                       | 3.4                      | 1.7                         | 0.0        |
| <i>STS2</i>   | 41.7                   | 0.9                        | 47.7                      | 31.2                       | 3.0                      | 20.3                        | 0.0        |
| <i>STS2s</i>  | 29.1                   | 1.2                        | 52.1                      | 45.7                       | 1.8                      | 1.0                         | 0.0        |
| <i>Hchl9</i>  | 121.6                  | 0.4                        | 75.4                      | 21.4                       | 9.9                      | 2.7                         | 0.0        |
| <i>A3</i>     | 25.1                   | 0.8                        | 28.1                      | 22.4                       | 2.4                      | 48.7                        | 0.0        |
| <i>HH</i>     | 3,654.0                | 0.0                        | 1.5                       | 0.1                        | 12.1                     | 98.5*                       | 4.4        |
| <i>A4</i>     | 297.9                  | 0.2                        | 43.2                      | 9.0                        | 5.8                      | 47.6                        | 0.0        |

Table 2 Solution of the small-size instances.
